# Supplementary material for: Evaluation of electrospun fibers as solid phase extraction sorbents for sample preparation in HPLC-MS/MS confirmatory doping control analysis of dexamethasone and betamethasone
Source: Royal Society of Chemistry journal article supplement (doi:10.1039/c3ay40606g), 2013-01-01
Supplement: c3ay40606g.pdf [file c3ay40606g.pdf]

**Table 4. Evaluation of LOD at 10 ppb.** Retention times and relative intensities of ions for selected transition (precursor ion  $m/z$  393 to  $m/z$  373, 355 and 337). Samples are confirmed positive when both the retention time and the fragmentation pattern of the analyte do not differ (according to WADA ranges) from that of a reference standard which is analyzed in the same batch. A. Betamethasone B. Dexamethasone,

| A. Betamethasone               |             |         |           |         |         |
|--------------------------------|-------------|---------|-----------|---------|---------|
| Day 1                          | Ret Time    | Ion 373 | Ion 355   | Ion 337 | Ion 319 |
| Std 100 ppb                    | 12,1        | 100     | 21,5      | 7,5     | 2,8     |
| WADA Range                     | 11,9 - 12,3 | 85-100  | 11,5-31,5 | 0-17,5  | 0-12,8  |
| Blank + Std 100 ppb (1)        | 12,1        | 100     | 20,7      | 5,8     | 1,6     |
| Blank + Std 100 ppb (2)        | 12,1        | 100     | 20,7      | 7,9     | 1,7     |
| Spiked Urine 10 ppb (Sample 1) | 12,1        | 100     | 23,6      | 8,9     | 3,7     |
| Spiked Urine 10 ppb (Sample 2) | 12,1        | 100     | 22,1      | 7       | 2,9     |
| Spiked Urine 10 ppb (Sample 3) | 12,1        | 100     | 21,1      | 7,1     | 2,7     |
| Day 2                          | Ret Time    | Ion 373 | Ion 355   | Ion 337 | Ion 319 |
| Std 100 ppb                    | 12,2        | 100     | 24,9      | 8,2     | 2,7     |
| WADA Range                     | 12,0-12,4   | 85-100  | 14,9-34,9 | 0-18,2  | 0-12,7  |
| Blank + Std 100 ppb (1)        | 12,4        | 100     | 23,3      | 8,5     | 2,9     |
| Blank + Std 100 ppb (2)        | 12,4        | 100     | 23,4      | 7       | 3,8     |
| Spiked Urine 10 ppb (Sample 1) | 12,4        | 100     | 24,7      | 6,9     | 4,3     |
| Spiked Urine 10 ppb (Sample 2) | 12,4        | 100     | 25,2      | 7,3     | 4,2     |
| Spiked Urine 10 ppb (Sample 3) | 12,4        | 100     | 19,1      | 7,3     | 2,5     |
| Day 3                          | Ret Time    | Ion 373 | Ion 355   | Ion 337 | Ion 319 |
| Std 100 ppb                    | 12,2        | 100     | 20,8      | 7,2     | 3,9     |
| WADA Range                     | 12,0-12,4   | 85-100  | 10,8-30,8 | 0-17,2  | 0-13,9  |
| Blank + Std 100 ppb (1)        | 12,2        | 100     | 24,3      | 6,9     | 3,4     |
| Blank + Std 100 ppb (3)        | 12,2        | 100     | 21,1      | 6       | 2,9     |
| Spiked Urine 10 ppb (Sample 1) | 12,2        | 100     | 21        | 5,6     | 3,9     |
| Spiked Urine 10 ppb (Sample 2) | 12,1        | 100     | 21,8      | 6,6     | 2,7     |
| Spiked Urine 10 ppb (Sample 3) | 12,2        | 100     | 18,7      | 6,6     | 2,6     |

B. Dexamethasone

| Day 1                          | Ret Time    | Ion 373 | Ion 355   | Ion 337  | Ion 319  |
|--------------------------------|-------------|---------|-----------|----------|----------|
| Std 100 ppb                    | 12,8        | 100     | 36,5      | 15,4     | 11,3     |
| WADA Range                     | 12,5 - 13,1 | 85-100  | 27,4-45,6 | 5,4-25,4 | 1,3-21,3 |
| Blank + Std 100 ppb (1)        | 12,8        | 100     | 36,5      | 18       | 12,8     |
| Blank + Std 100 ppb (2)        | 12,8        | 100     | 41,5      | 17,4     | 8,7      |
| Spiked Urine 10 ppb (Sample 1) | 12,8        | 100     | 44        | 18,3     | 13       |
| Spiked Urine 10 ppb (Sample 2) | 12,8        | 100     | 36,4      | 18,6     | 11,1     |
| Spiked Urine 10 ppb (Sample 3) | 12,8        | 100     | 40,7      | 17,4     | 9        |

| Day 2                          | Ret Time  | Ion 373 | Ion 355   | Ion 337   | Ion 319  |
|--------------------------------|-----------|---------|-----------|-----------|----------|
| Std 100 ppb                    | 13        | 100     | 38,9      | 20,1      | 10,3     |
| WADA Range                     | 12,7-13,3 | 85-100  | 29,2-48,6 | 10,1-30,1 | 0,3-20,3 |
| Blank + Std 100 ppb (1)        | 13,1      | 100     | 38,4      | 20,7      | 12,5     |
| Blank + Std 100 ppb (3)        | 13,2      | 100     | 44,4      | 21        | 13,2     |
| Spiked Urine 10 ppb (Sample 1) | 13,1      | 100     | 39,7      | 17,7      | 13,4     |
| Spiked Urine 10 ppb (Sample 2) | 13        | 100     | 38,7      | 20,1      | 10,8     |
| Spiked Urine 10 ppb (Sample 3) | 13        | 100     | 36,3      | 19,7      | 11,1     |

| Day 3                          | Ret Time    | Ion 373 | Ion 355   | Ion 337  | Ion 319 |
|--------------------------------|-------------|---------|-----------|----------|---------|
| Std 100 ppb                    | 12,8        | 100     | 37,3      | 16,6     | 9,7     |
| WADA Range                     | 12,5 - 13,1 | 85-100  | 28,0-46,6 | 6,6-26,6 | 0-19,7  |
| Blank + Std 100 ppb (1)        | 12,8        | 100     | 39,6      | 14       | 11,1    |
| Blank + Std 100 ppb (3)        | 12,8        | 100     | 38,1      | 17,7     | 10,4    |
| Spiked Urine 10 ppb (Sample 1) | 12,8        | 100     | 42,1      | 16,5     | 12,5    |
| Spiked Urine 10 ppb (Sample 2) | 12,8        | 100     | 37,3      | 18,8     | 11,8    |
| Spiked Urine 10 ppb (Sample 3) | 12,8        | 100     | 43        | 19,2     | 9,7     |
